# Supplementary material
Source: PubMed Central journal article supplement (PMC10580294)
Supplement: NIHMS1898033-supplement-2.pdf [file NIHMS1898033-supplement-2.pdf]

Figure S1.

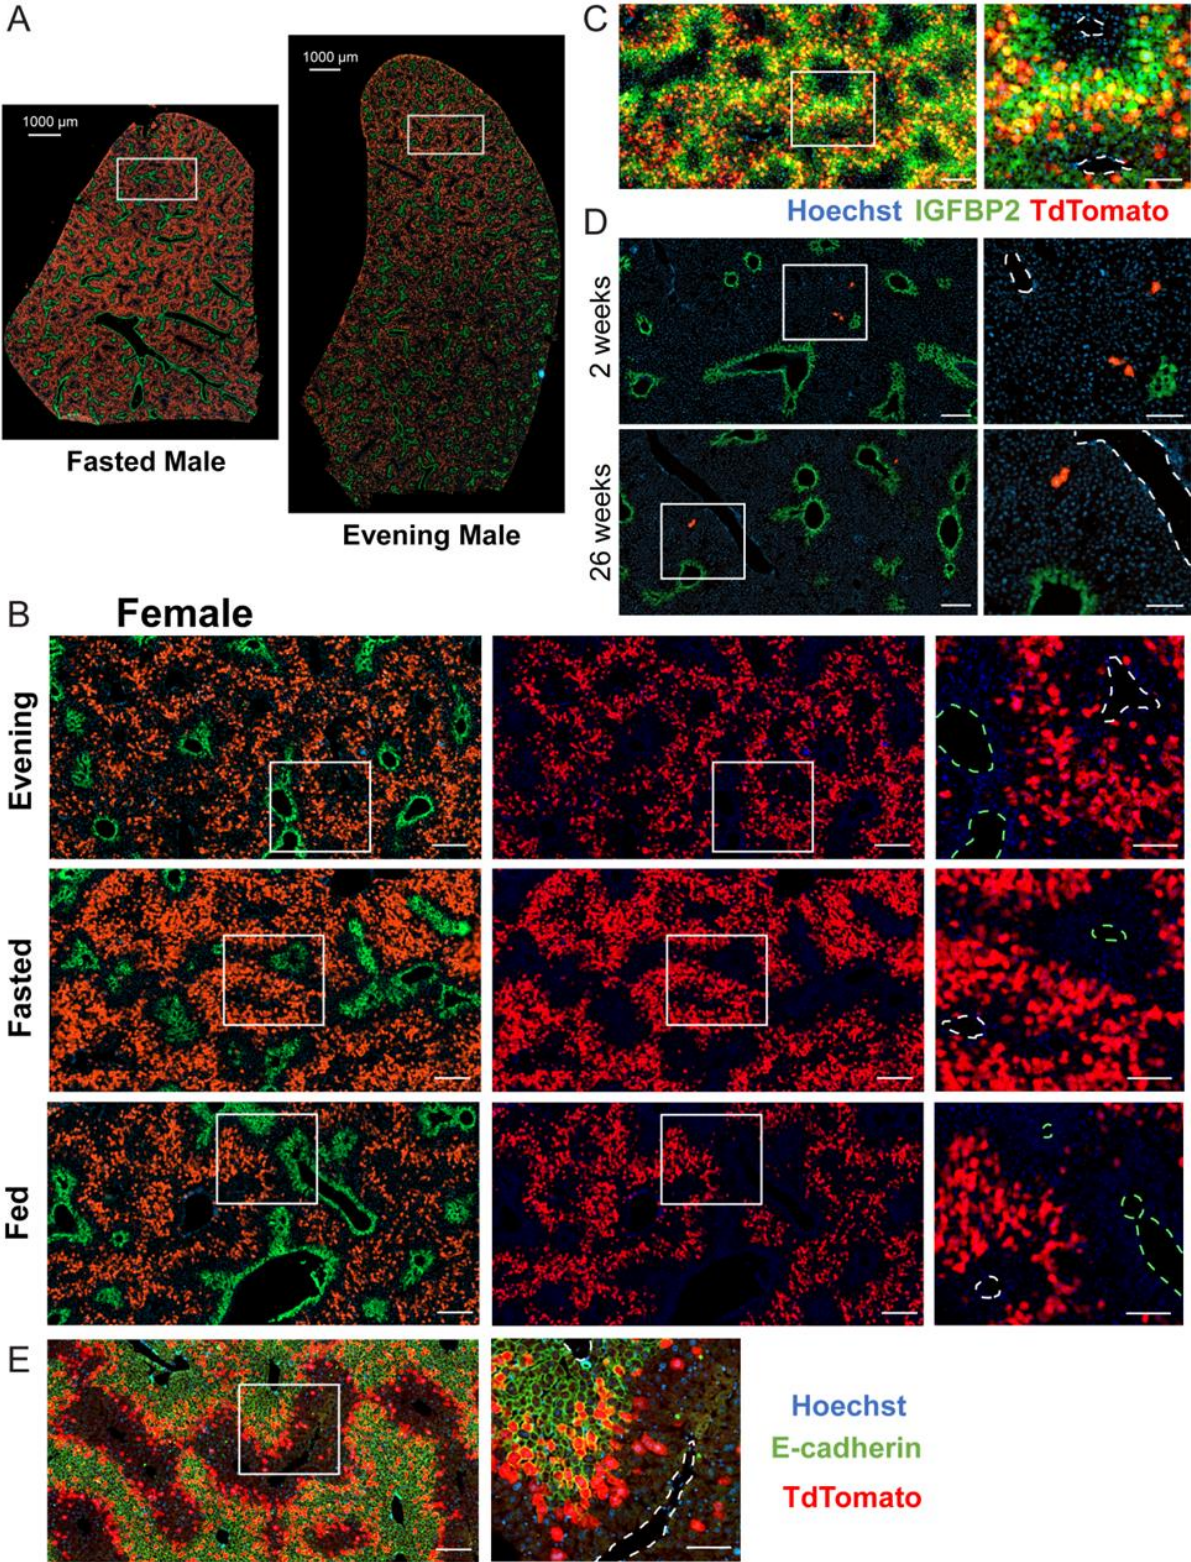

**Supplemental Figure S1. The *Igfbp2-CreER* strain labels midlobular zone 2 hepatocytes after tamoxifen. Data related to Figure 1.**

**A.** Whole-section images of fed tamoxifen and evening tamoxifen males from **Figure 1C**. Scale bar = 1000  $\mu\text{m}$  for cross-sectional images. Slides were stained for GS (green).

**B.** Representative images of female *Igfbp2-CreER* mice labeled using three distinct tamoxifen approaches. Scale bar = 200  $\mu\text{m}$  for cropped images and 100  $\mu\text{m}$  for magnified images. Slides were stained for GS (green). The green dashed circles represent CVs (marked by GS), and the white dashed circles represent PVs.

**C.** Representative images of *Igfbp2-CreER* labeled zone 2 cells (red) co-stained with IGFBP2 (green). Scale bar = 200  $\mu\text{m}$  for cropped images and 100  $\mu\text{m}$  for magnified images. The dashed circles represent veins.

**D.** Representative images of *Igfbp2-CreER; LSL-tdTomato* livers 2 and 26 weeks after oil administration without tamoxifen. Scale bar = 200  $\mu\text{m}$  for cropped images and 100  $\mu\text{m}$  for magnified images. Slides were stained for GS (green). The white dashed circles represent PVs.

**E.** Representative images of *Igfbp2-CreER* labeled zone 2 cells co-stained with E-cadherin, a marker of periportal hepatocytes (green). Scale bar = 200  $\mu\text{m}$  for cropped images and 100  $\mu\text{m}$  for magnified images. The dashed circles represent veins.

**Figure S2.**

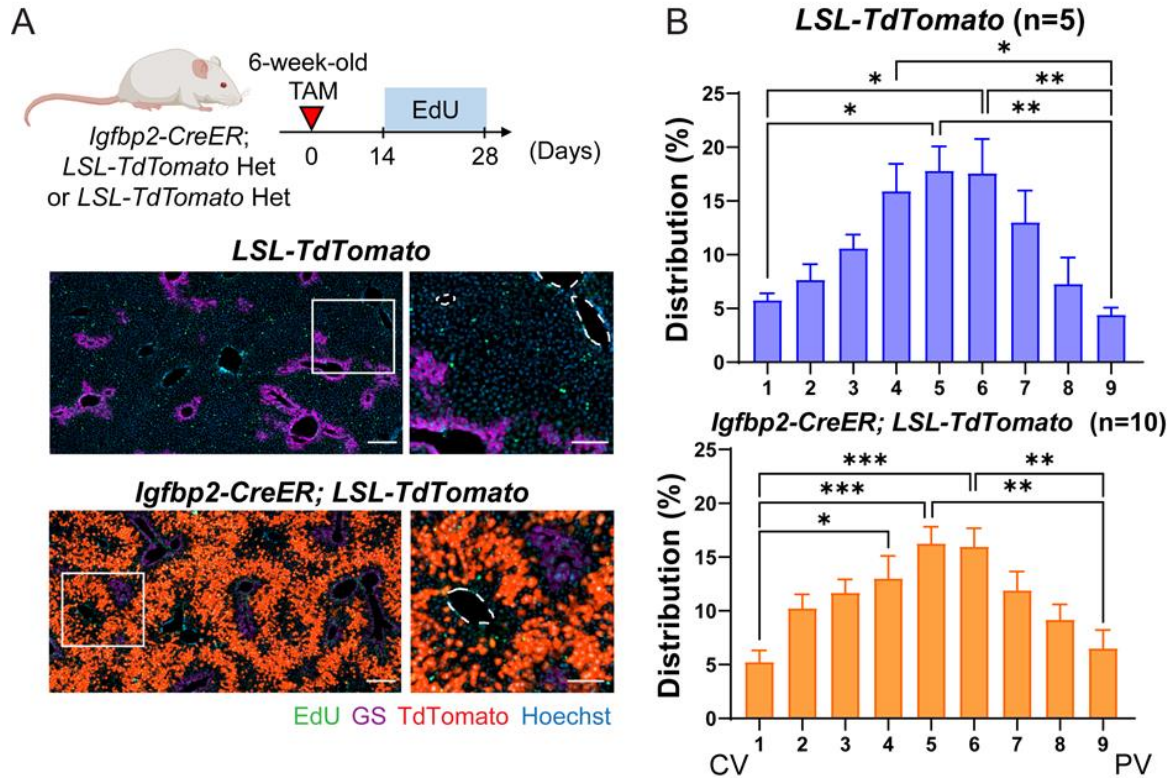

**Supplemental Figure S2. The *Igfbp2-CreER* transgene does not alter the distribution of zonal proliferation when compared to WT littermates. Data related to Figure 1.**

**A.** Schema and representative images of *LSL-tdTomato* and *Igfbp2-CreER; LSL-tdTomato* livers after fasting tamoxifen followed by 14 days of EdU incorporation. Scale bar = 200  $\mu$ m for cropped images and 100  $\mu$ m for magnified images. Slides were stained for EdU (green) and GS (purple). The white dashed circles represent PVs.

**B.** Quantification of spatial distribution of EdU+ cells from **A**.

All data in this figure are presented as mean  $\pm$  SEM. Significance is displayed as  $p < 0.05$  (\*),  $p < 0.01$  (\*\*),  $p < 0.001$ \*\*\*), and  $p < 0.0001$  (\*\*\*\*).



**Figure S3.**

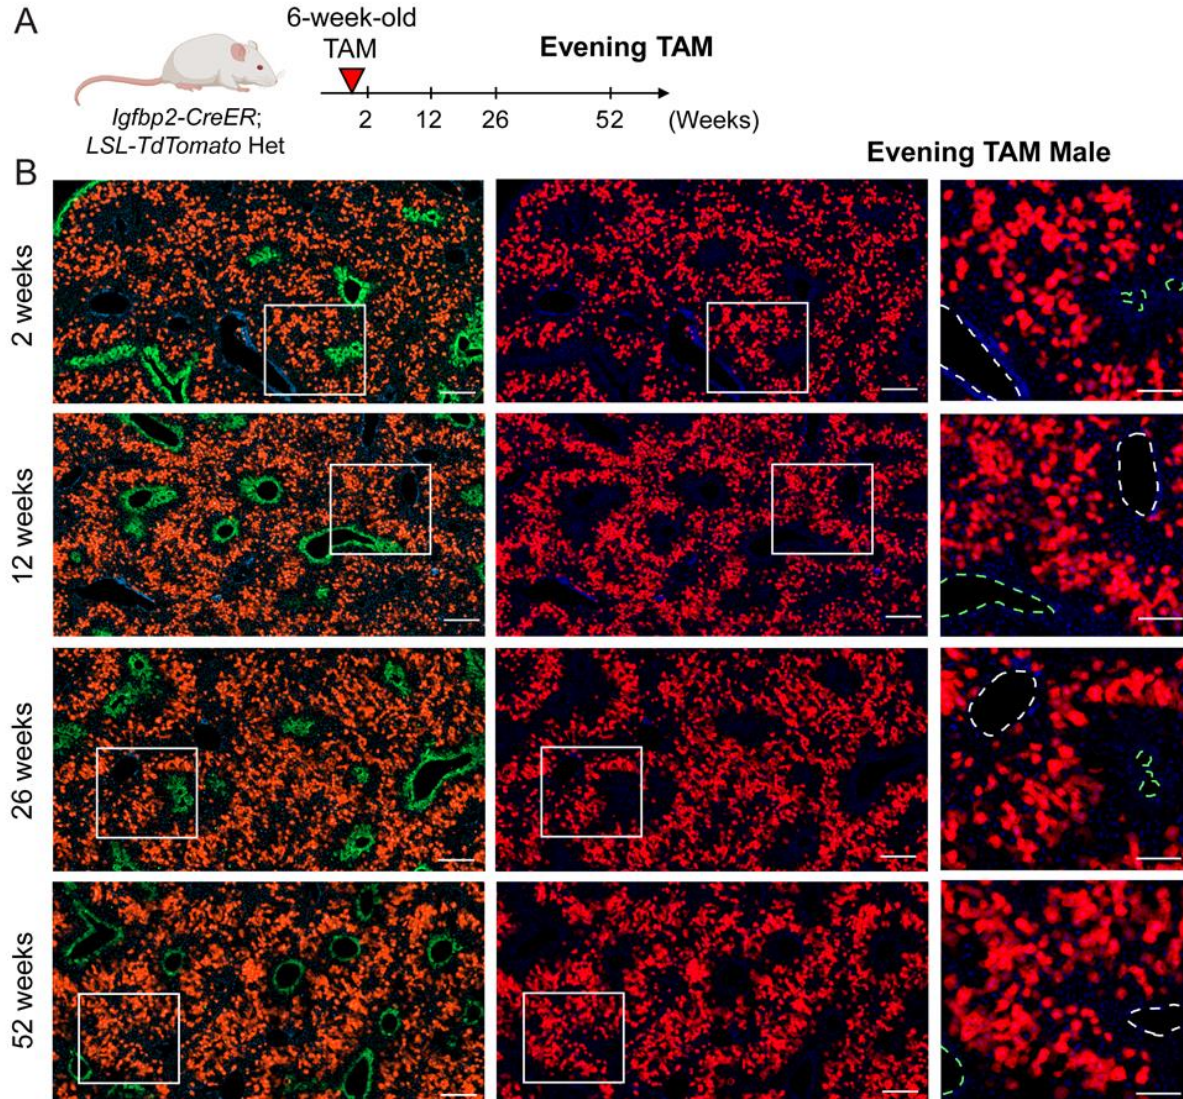

**Supplemental Figure S3. Zone 2 cells labeled by the evening tamoxifen approach expand during homeostasis in female mice. Data related to Figure 2.**

**A.** Schema of evening tamoxifen lineage tracing experiment under normal homeostasis.

**B.** Representative images of male evening tamoxifen tracing over 2, 12, 26 and 52 weeks. Scale bar = 200  $\mu\text{m}$  for cropped images and 100  $\mu\text{m}$  for magnified images. Slides were stained for GS (green). The green dashed circles represent CVs (marked by GS), and the white dashed circles represent PVs.



Figure S4.

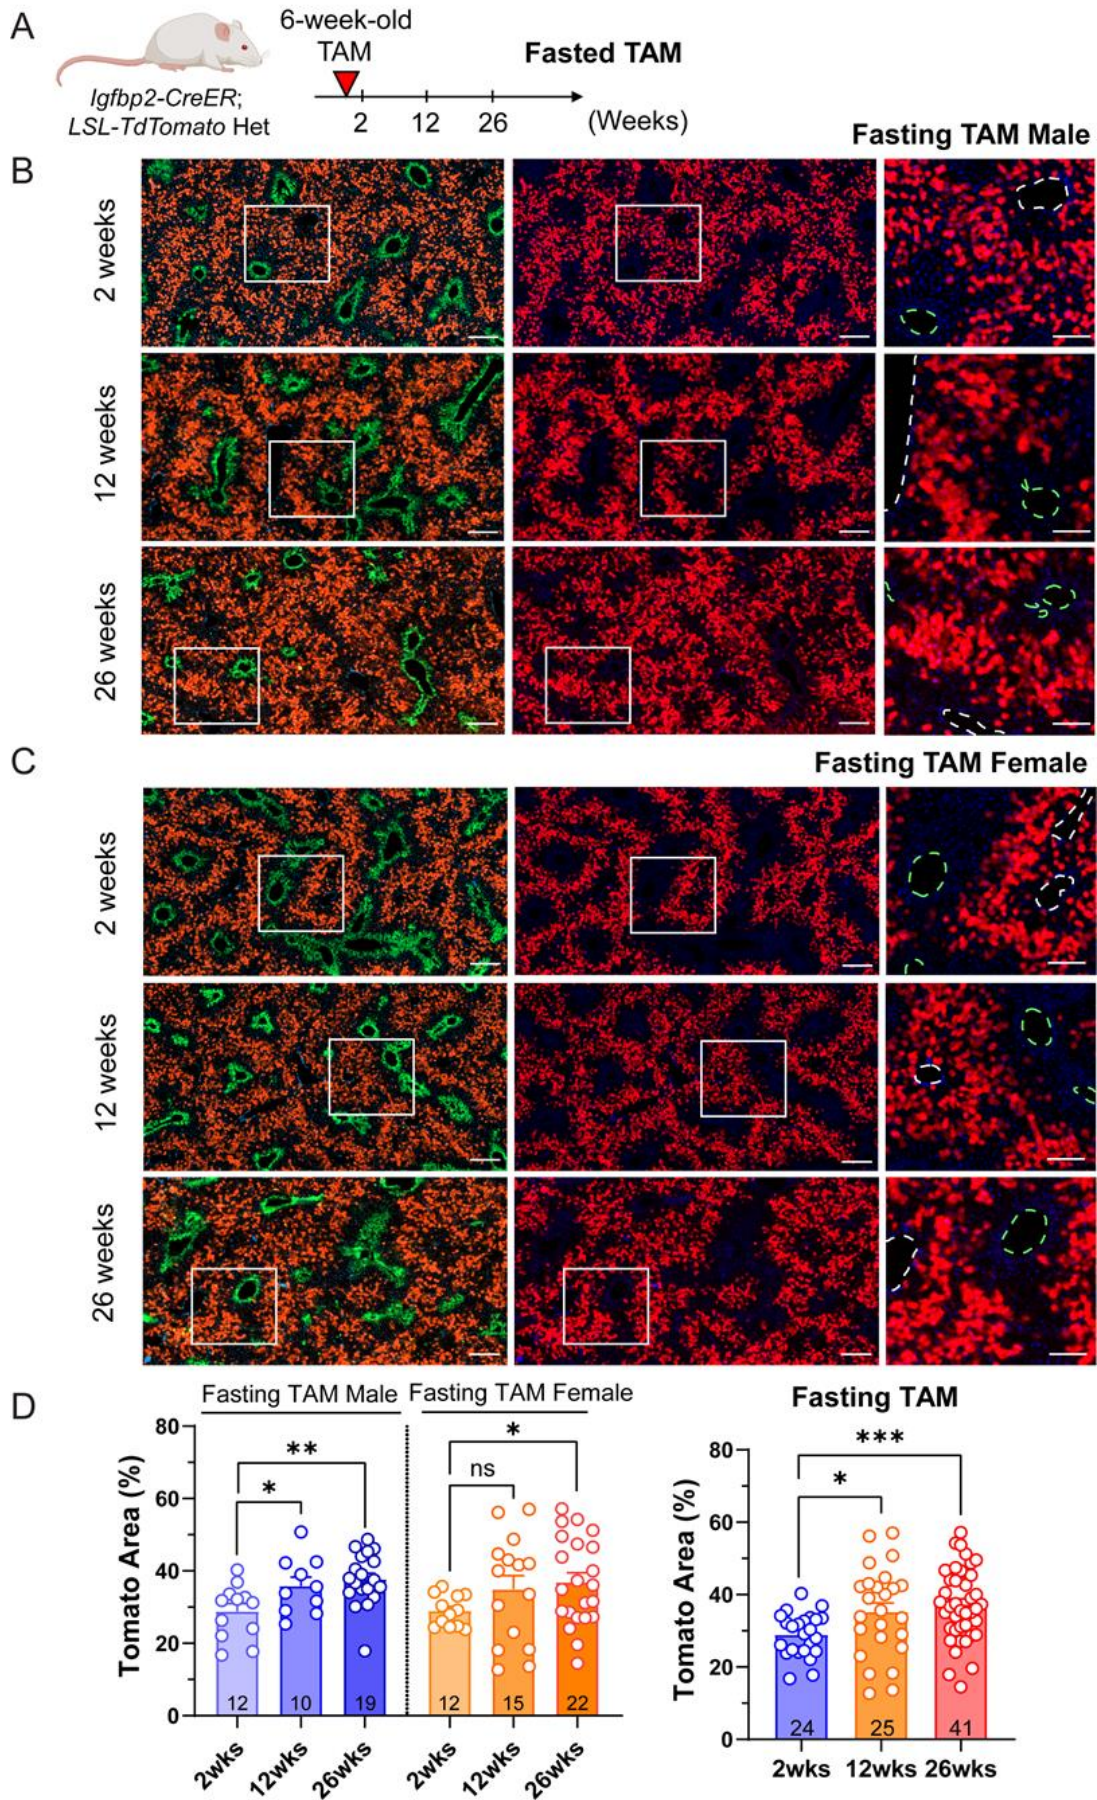

**Supplemental Figure S4. Zone 2 cells expand during homeostasis. Data related to Figures 2.**

**A.** Schema of fasting tamoxifen lineage tracing experiment under normal homeostasis.

**B.** Representative images of male fasting tamoxifen tracing over 2, 12 and 26 weeks. Scale bar = 200  $\mu\text{m}$  for cropped images and 100  $\mu\text{m}$  for magnified images. Slides were stained for GS (green). The green dashed circles represent CVs (marked by GS), and the white dashed circles represent PVs.

**C.** Representative images of female fasting tamoxifen tracing over 2, 12 and 26 weeks.

**D.** Quantification of the Tomato area from **B** and **C**. The right panel combines all of the data from the two sexes shown in the left panel. The 2-week data points are the same data as the fasting timepoints in **Figure 1E** (n = 24, 25, 41 mice for 2, 12, 26 weeks).

All data in this figure are presented as mean  $\pm$  SEM. Significance is displayed as  $p < 0.05$  (\*),  $p < 0.01$  (\*\*),  $p < 0.001$ (\*\*\*), and  $p < 0.0001$  (\*\*\*\*).



Figure S5.

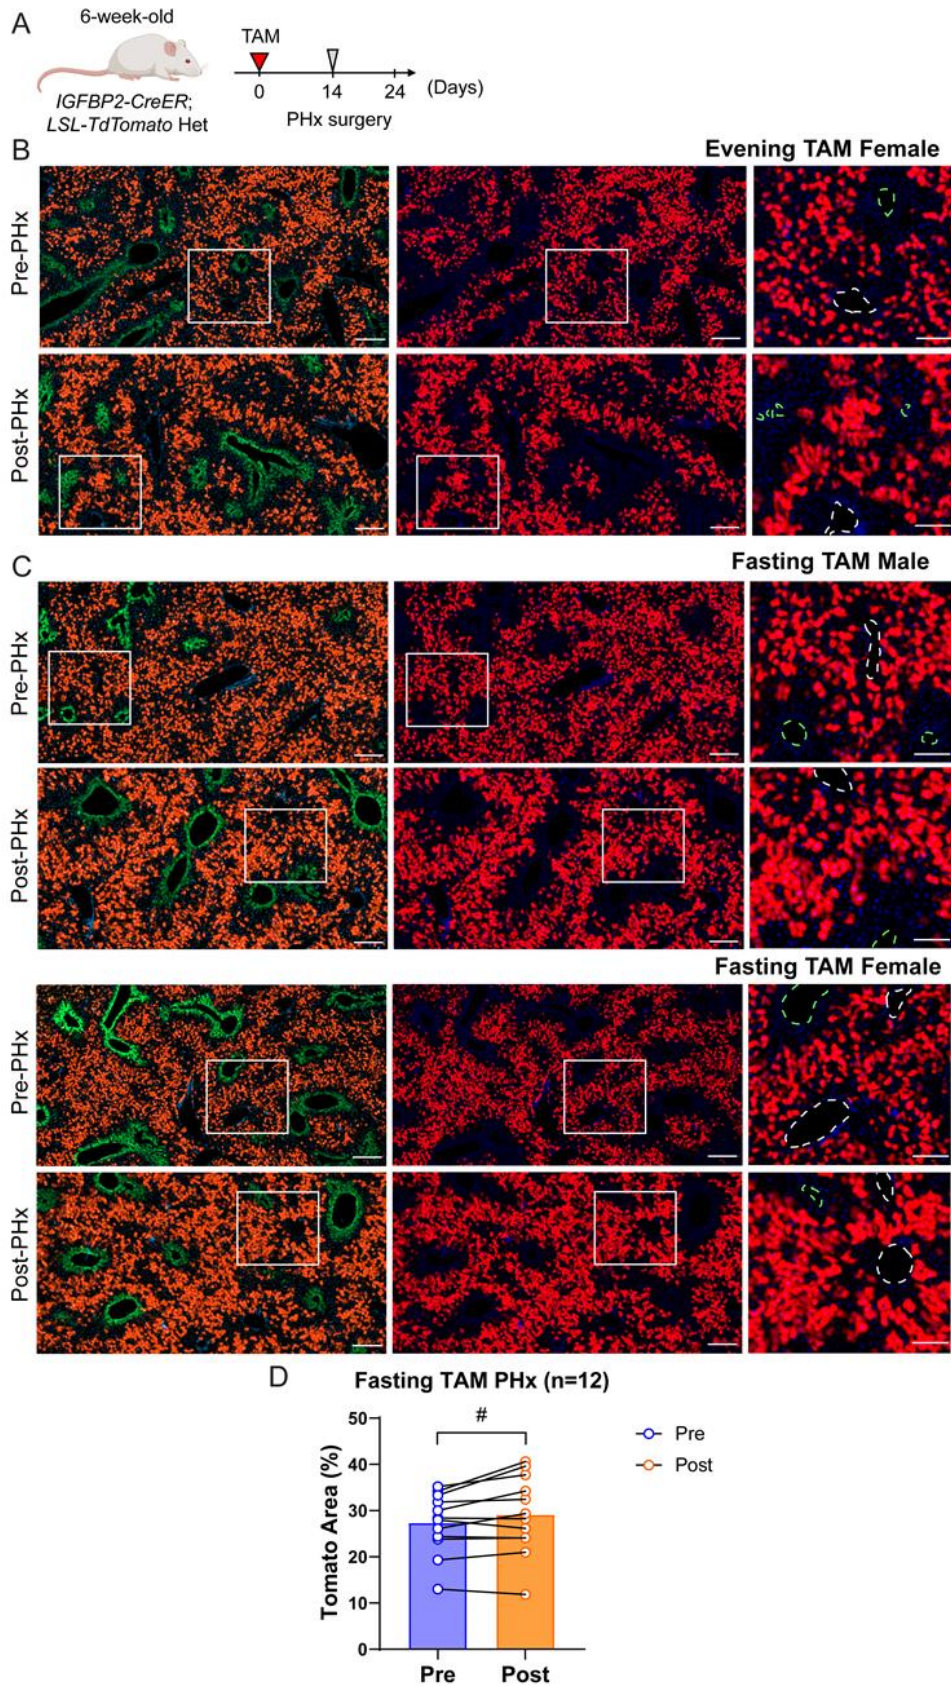

**Supplemental Figure S5. Zone 2 hepatocytes labeled in *Igfbp2-CreER* mice expand after PHx. Data related to Figure 4.**

**A.** Schema of the *Igfbp2-CreER* lineage tracing experiment in the context of PHx.

**B.** Representative images of evening tamoxifen labeled females, pre- and post-PHx. Scale bar = 200  $\mu\text{m}$  for cropped images and 100  $\mu\text{m}$  for magnified images. Slides were stained for GS (green). The green dashed circles represent CVs (marked by GS), and the white dashed circles represent PVs.

**C.** Representative images of fasting tamoxifen pre- and post-PHx.

**D.** Quantification of the Tomato area from **C**. Significance was assessed by paired t-tests (n = 12 mice).

All data in this figure are presented as mean  $\pm$  SEM. The statistical significance is displayed as # ( $p < 0.05$ ) in the paired analysis.



Figure S6.

A

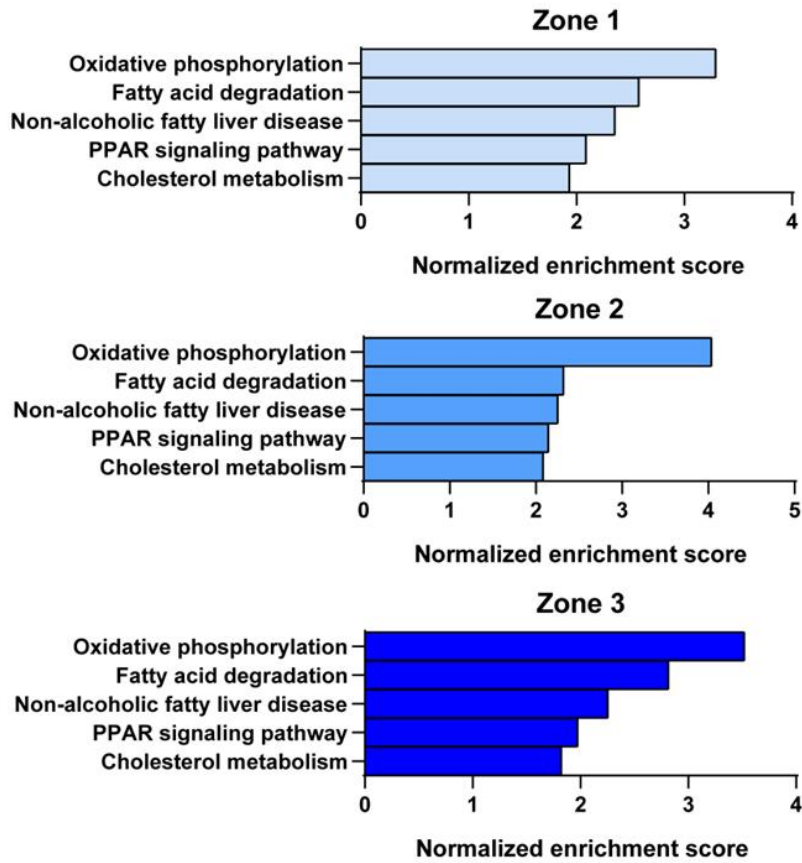

B

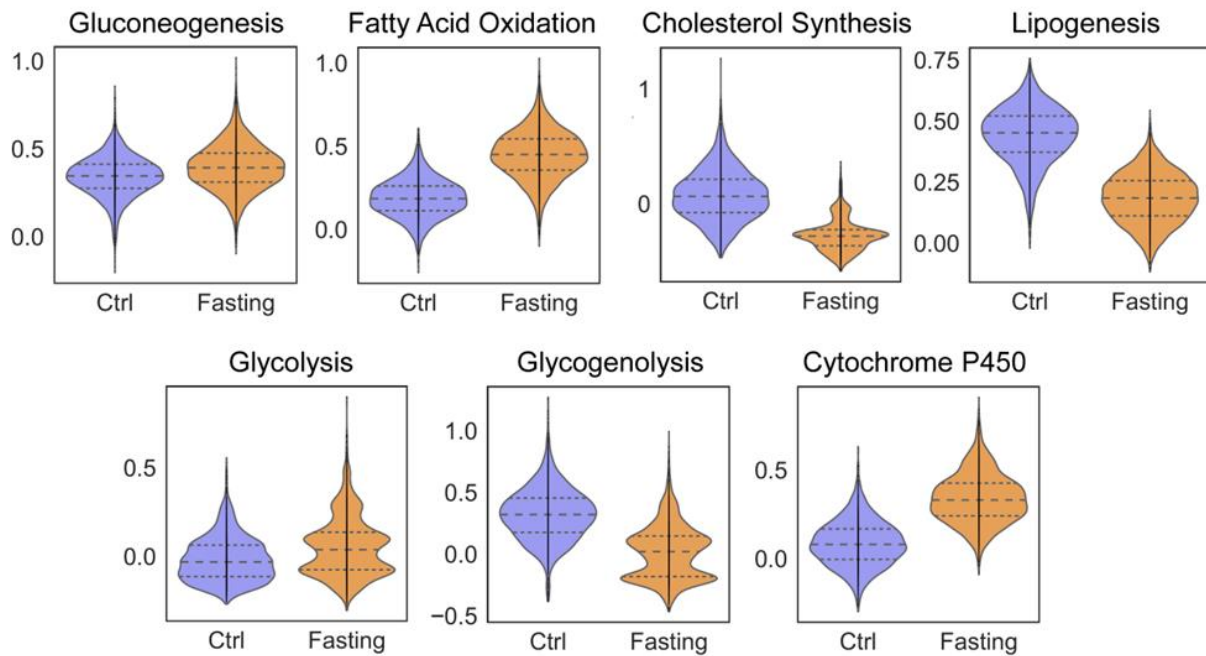

**Supplemental Figure S6. Metabolic pathways change in the fasted liver. Data related to Figure 6.**

**A.** KEGG pathway enrichment analysis of differentially expressed genes in each zonal population.

**B.** Metabolic pathway analysis of the snRNA-seq dataset grouped by normal and fasting conditions.
